# Supplementary material
Source: ML conference proceedings conference paper supplement (https://aclanthology.org/P15-1024)
Supplement: Notes [file P15-1024.Notes.pdf]

# Supplementary for “Learning Answer-Entailing Structures for Machine Comprehension”

**Mrinmaya Sachan**<sup>1</sup>      **Avinava Dubey**<sup>1</sup>      **Matthew Richardson**<sup>2</sup>      **Eric P. Xing**<sup>1</sup>  
<sup>1</sup>Carnegie Mellon University      <sup>2</sup>Microsoft Research  
<sup>1</sup>{`mrinmays, akdubey, epxing`}@cs.cmu.edu      <sup>2</sup>`mattri@microsoft.com`

## 1 Results on MCTest dataset

Table 1 shows the detailed numbers in the Figure 2 of the main paper.

## 2 Results on bAbI dataset

Table 2 shows the complete results of various LSSVM models on the *bAbI* datasets for each sub-task. In our experiments, we observed a similar general pattern of improvement of LSSVM over the baselines as well as the improvement due to multi-task learning. Again task classification helped the multi-task learner the most and the QA classification helped more than the QClassification. The results on performance within the sub-tasks described in the main paper are substantiated by these numbers.

## 3 Structures Learned

Some more examples of the *text-entailing* structures learned by of model on the MCTest real data are given in Figure 1

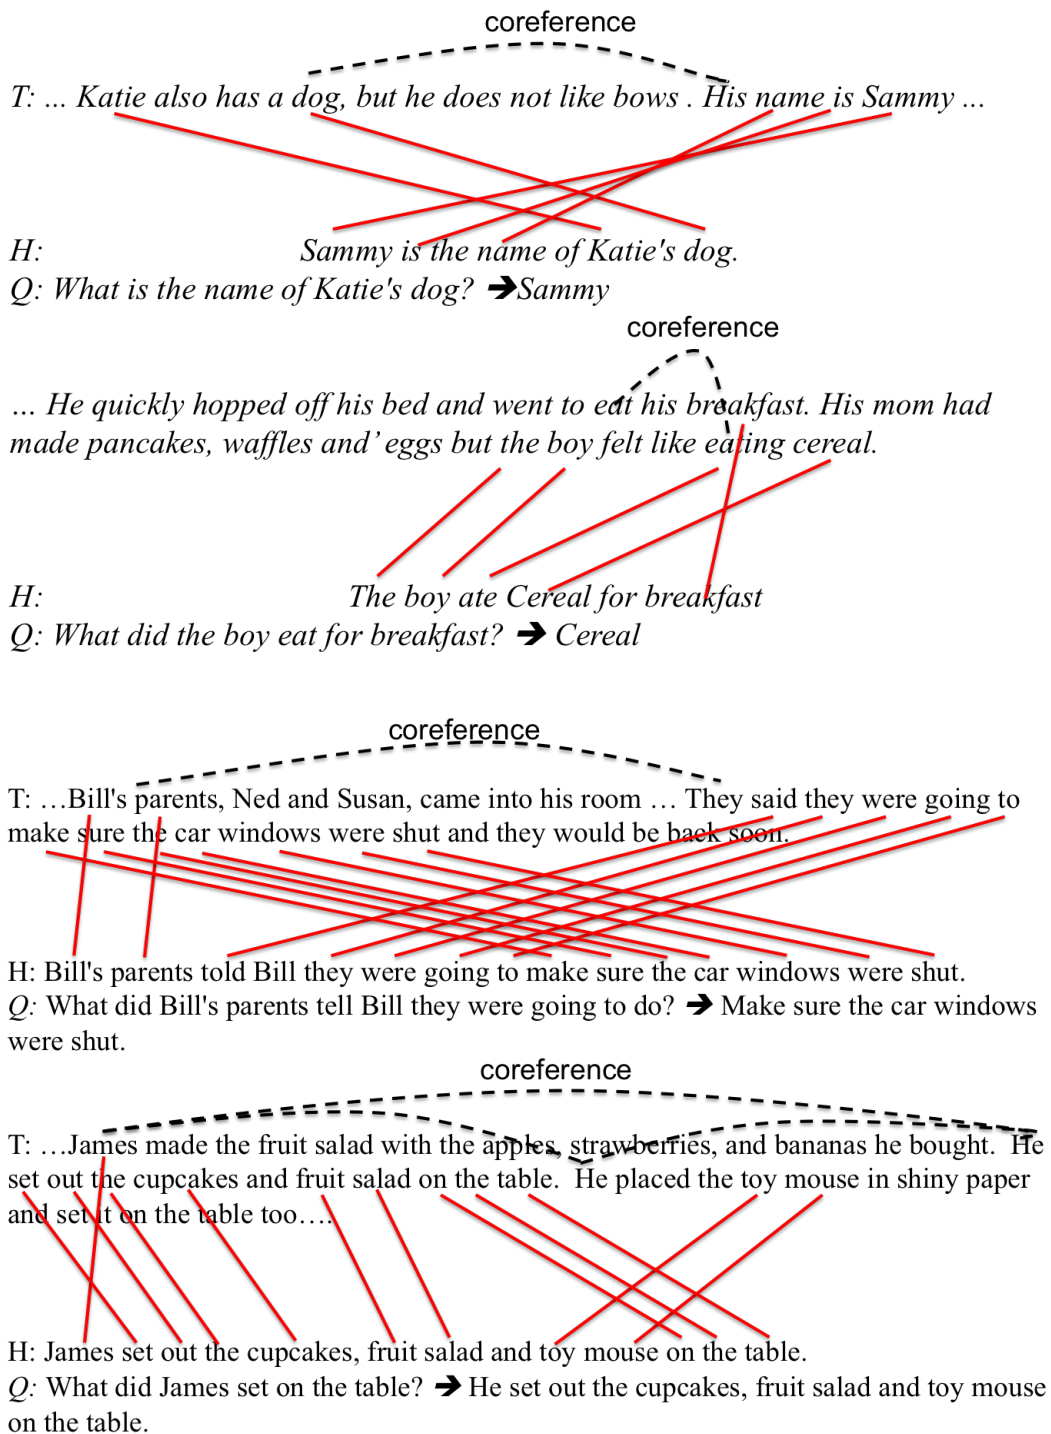

Figure 1: Some more latent *answer-entailing* structures learned by our model.

|                  |                         | <b>Single</b>                                  | <b>Multiple</b> | <b>All</b>  |             |
|------------------|-------------------------|------------------------------------------------|-----------------|-------------|-------------|
| <b>LSSVM</b>     | <b>Sentence</b>         | 62.16/0.854                                    | 60.23/0.825     | 61.28/0.839 |             |
|                  | <b>Subset</b>           | 61.83/0.841                                    | 65.75/0.862     | 63.97/0.852 |             |
|                  | <b>Subset+</b>          | 61.12/0.835                                    | 66.67/0.864     | 64.15/0.852 |             |
|                  | <b>Subset+/Negation</b> | 63.24/0.857                                    | 66.15/0.863     | 64.83/0.861 |             |
|                  | <b>MultiTask</b>        | <b>Subset+/Negation<br/>QClassification</b>    | 64.34/0.860     | 66.46/0.864 | 65.50/0.863 |
|                  |                         | <b>Subset+/Negation<br/>QAClassification</b>   | 66.18/0.863     | 67.37/0.866 | 66.83/0.865 |
|                  |                         | <b>Subset+/Negation<br/>TaskClassification</b> | 67.65/0.867     | 67.99/0.869 | 67.83/0.868 |
| <b>Baselines</b> | <b>SW</b>               | 54.56/0.785                                    | 54.04/0.784     | 54.28/0.784 |             |
|                  | <b>SW+D</b>             | 62.99/0.834                                    | 58.00/0.805     | 59.93/0.818 |             |
|                  | <b>RTE</b>              | 69.85/0.869                                    | 42.71/0.728     | 55.01/0.791 |             |
|                  | <b>LSTM</b>             | 62.13/0.833                                    | 58.84/0.811     | 60.33/0.821 |             |
|                  | <b>QANTA</b>            | 63.23/0.842                                    | 59.45/0.820     | 61.00/0.830 |             |

Table 1: Comparison of variations of our method against several baselines on the MCTest-500 dataset. The table shows two statistics, accuracy and NDCG<sub>4</sub> (written as accuracy/NDCG<sub>4</sub>) on the test set of MCTest-500. All differences between the baselines and LSSVMs, the improvement due to negation and the improvements due to multi-task learning are significant ( $p < 0.01$ ) using the two-tailed paired T-test.

| Tasks                         | Baselines |     |      |       | LSSVM    |        |         |                  |                                     |                                      |                                        |
|-------------------------------|-----------|-----|------|-------|----------|--------|---------|------------------|-------------------------------------|--------------------------------------|----------------------------------------|
|                               | SW        | RTE | LSTM | QANTA | Sentence | Subset | Subset+ | Subset+/Negation | MultiTask                           |                                      |                                        |
|                               |           |     |      |       |          |        |         |                  | Subset+/Negation<br>QClassification | Subset+/Negation<br>QAClassification | Subset+/Negation<br>TaskClassification |
| <b>Single Supporting Fact</b> | 36        | 98  | 50   | 89    | 100      | 100    | 100     | 100              | 100                                 | 100                                  | 100                                    |
| <b>Two Supporting Facts</b>   | 2         | 79  | 20   | 69    | 60       | 91     | 92      | 91               | 93                                  | 93                                   | 94                                     |
| <b>Three Supporting Facts</b> | 7         | 46  | 20   | 42    | 52       | 84     | 86      | 84               | 86                                  | 87                                   | 88                                     |
| <b>Two Arg. Relations</b>     | 50        | 54  | 61   | 68    | 89       | 91     | 91      | 90               | 92                                  | 93                                   | 93                                     |
| <b>Three Arg. Relations</b>   | 20        | 31  | 70   | 63    | 84       | 89     | 89      | 88               | 91                                  | 90                                   | 91                                     |
| <b>Yes/No Questions</b>       | 49        | 48  | 48   | 54    | 58       | 58     | 58      | 78               | 81                                  | 84                                   | 85                                     |
| <b>Counting</b>               | 52        | 11  | 49   | 55    | 61       | 59     | 63      | 61               | 65                                  | 64                                   | 64                                     |
| <b>Lists/Sets</b>             | 42        | 34  | 45   | 47    | 55       | 72     | 73      | 71               | 77                                  | 80                                   | 82                                     |
| <b>Simple Negation</b>        | 62        | 56  | 64   | 72    | 63       | 63     | 64      | 76               | 79                                  | 80                                   | 81                                     |
| <b>Indefinite Knowledge</b>   | 45        | 43  | 44   | 68    | 74       | 74     | 78      | 87               | 88                                  | 91                                   | 92                                     |
| <b>Basic Coreference</b>      | 25        | 31  | 72   | 80    | 91       | 93     | 96      | 96               | 97                                  | 97                                   | 98                                     |
| <b>Conjunction</b>            | 9         | 59  | 74   | 86    | 94       | 91     | 91      | 90               | 95                                  | 96                                   | 97                                     |
| <b>Compound Coreference</b>   | 26        | 72  | 94   | 95    | 86       | 89     | 89      | 88               | 93                                  | 93                                   | 94                                     |
| <b>Time Reasoning</b>         | 19        | 68  | 27   | 43    | 65       | 68     | 70      | 68               | 71                                  | 74                                   | 76                                     |
| <b>Basic Deduction</b>        | 20        | 49  | 21   | 72    | 76       | 74     | 78      | 76               | 80                                  | 81                                   | 82                                     |
| <b>Basic Induction</b>        | 43        | 53  | 23   | 55    | 57       | 59     | 61      | 58               | 61                                  | 63                                   | 64                                     |
| <b>Positional Reasoning</b>   | 46        | 66  | 51   | 55    | 81       | 85     | 88      | 88               | 90                                  | 91                                   | 90                                     |
| <b>Size Reasoning</b>         | 52        | 77  | 52   | 63    | 78       | 82     | 84      | 83               | 85                                  | 87                                   | 89                                     |
| <b>Path Finding</b>           | 0         | 11  | 8    | 45    | 9        | 9      | 9       | 9                | 11                                  | 11                                   | 11                                     |
| <b>Agents Motivations</b>     | 76        | 91  | 91   | 93    | 66       | 69     | 70      | 68               | 69                                  | 69                                   | 70                                     |
| <b>Mean Performance</b>       | 34        | 54  | 49   | 66    | 70       | 75     | 77      | 78               | 79                                  | 81                                   | 82                                     |

Table 2: Comparison of accuracies on the variations of our method against several baselines on 20 Tasks of the bAbI dataset. All integer differences are significant ( $p < 0.01$ ) using the two-tailed paired T-test.
